# Supplementary material for: The Divergent Key Residues of Two Agrobacterium fabrum (tumefaciens) CheY Paralogs Play a Key Role in Distinguishing Their Functions
Source: MDPI journal article supplement (doi:10.3390/microorganisms9061134), 2021-05-24
Supplement: s1 [file s1]

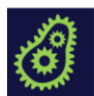

## Supplementary Data

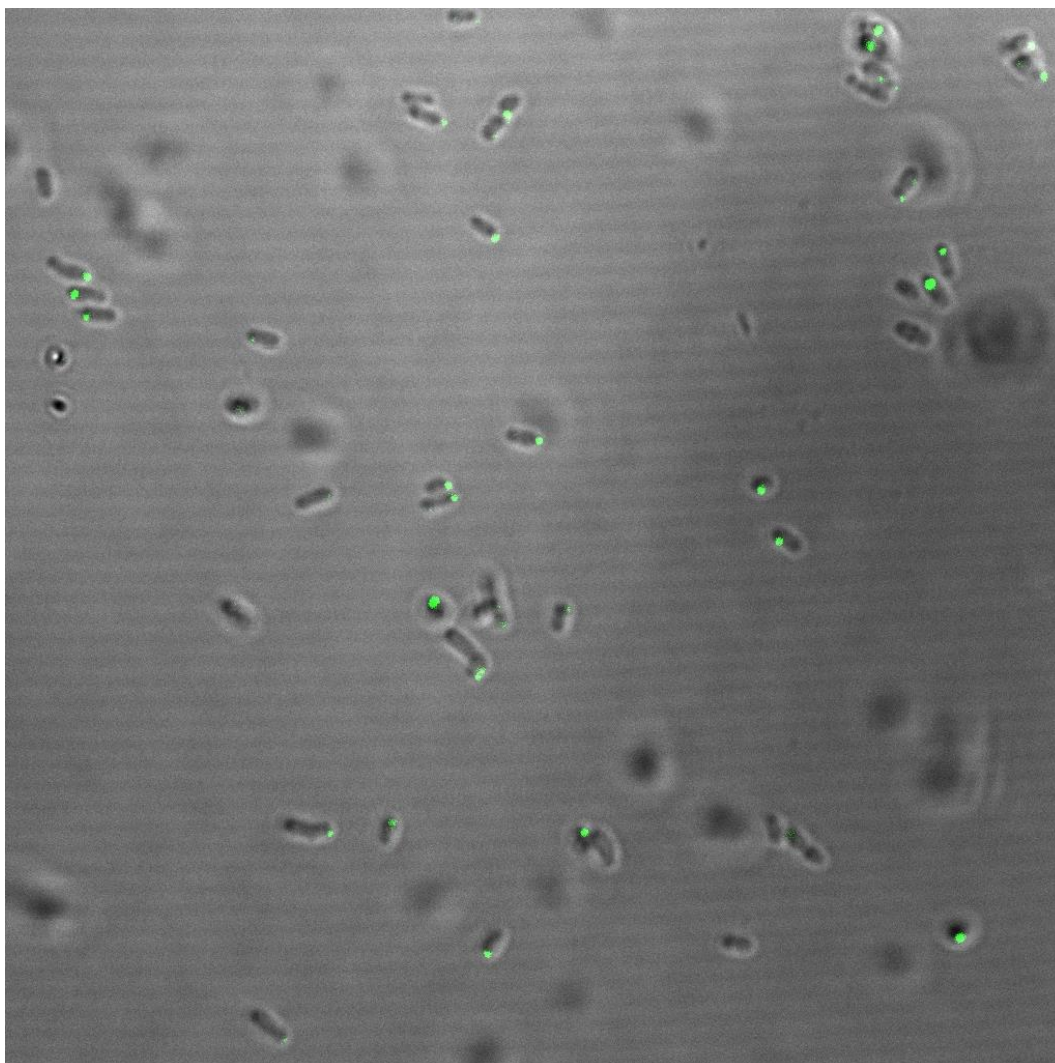

**Figure S1.** Polar co-localization of CheA with CheW1. eGFP was split into two non-fluorescent parts. The C-terminal part (Cegfp) of eGFP was fused to the C-terminus of CheA and the N-terminal part (Negfp) of eGFP was fused to the C-terminus of CheW1. CheA-Cegfp and CheW1-Negfp fusion proteins were equivalently co-expressed in *cheA-cheW1-cheW2* triple-deletion mutant ( $\Delta aw$ ). Interaction between two fusion proteins will result in the reconstitution of two split-eGFP parts and the reconstituted eGFP will emit fluorescence. Cells of mutant  $\Delta aw$  expressing these two fusion proteins were observed by using confocal laser-scanning microscopy.

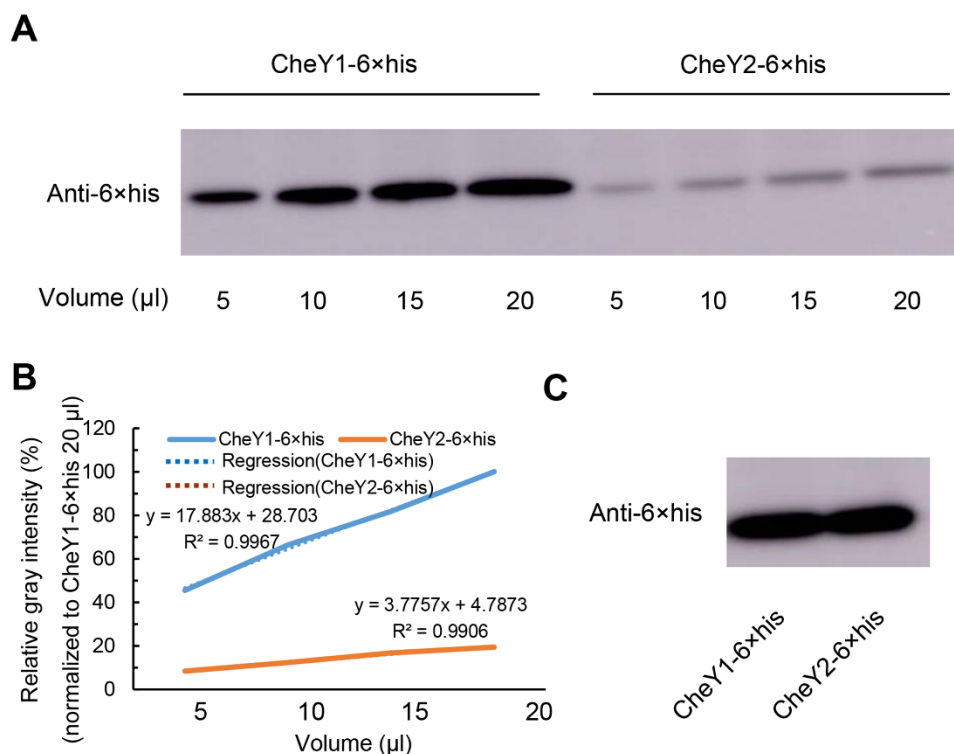

**Figure S2.** Estimation of the amount of CheY1-6×his and CheY2-6×his by Western blot. Different amounts of crude extraction of CheY1-6×his or CheY2-6×his were loaded to run SDS-PAGE. The separated proteins were analyzed by Western blot using anti-6×his tag antibody. (A) Western blotting band of CheY1-6×his and CheY2-6×his. The darkness of the Western blotting band is proportional to the amount of loaded CheY1-6×his or CheY2-6×his. (B) Relative gray intensity of the Western blotting band in (A). Relative gray intensity of the band is linear with the amount of loaded CheY1-6×his or CheY2-6×his and thus can be used to estimate the amount of CheY1-6×his or CheY2-6×his in the sample. (C) Western blotting determination of the relative concentration of CheY1-6×his and CheY2-6×his in their respective crude extract before using for pull-down.

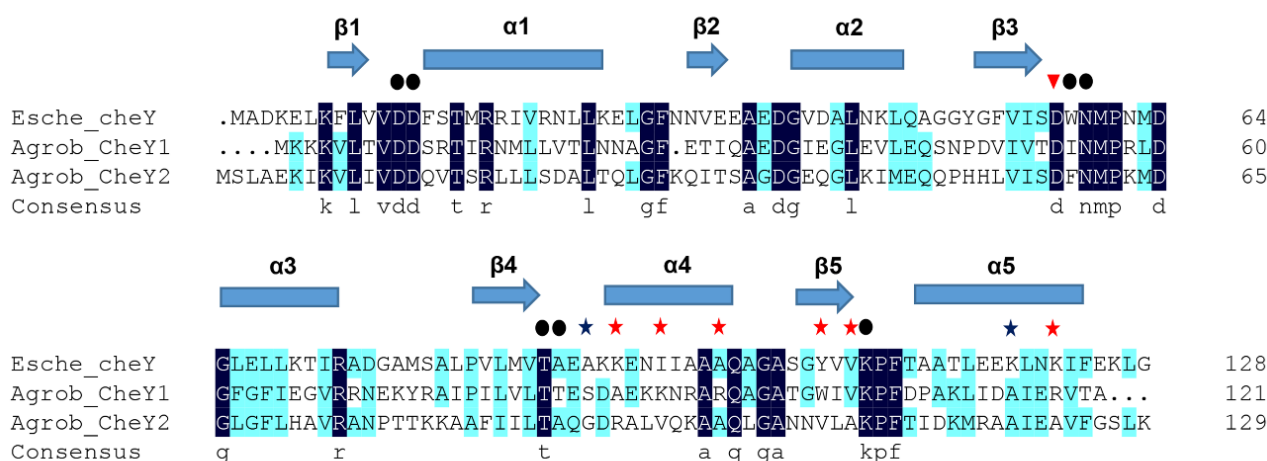

**Figure S3.** Sequence alignment of two CheYs of *Agrobacterium fabrum* with the CheY of *Escherichia coli*. Secondary structure elements of *E. coli* CheY are shown above the sequence ( $\alpha$  represents  $\alpha$ -helical structure and  $\beta$  represents  $\beta$ -folded structure). Numbers on the right indicate the position of amino acid. Sequences of two *A. fabrum* CheY proteins are from genome database (genome accession number: AE007869.2). Triangle indicates the active site residue of phosphorylation [54]. Black dots indicate the residues of the active-site pocket of phosphorylation in *E. coli* CheY [41]. Asterisks indicate the residues of *E. coli* CheY involved in FlIM binding [42]. The red asterisks indicate the site-directed mutation positions constructed in this work.

**Table S1.** Bacterial strains and plasmids used in this study.

| Bacterial strains and plasmids | Relevant feature(s)                                                                                        | Source or reference                                    |
|--------------------------------|------------------------------------------------------------------------------------------------------------|--------------------------------------------------------|
| <b>Strains</b>                 |                                                                                                            |                                                        |
| <i>Escherichia coli</i>        |                                                                                                            |                                                        |
| DH5a                           | <i>EndA1 hsdR17 supE44 thi-1 recA1 gyrA96 relA1 (argF-lacZYA) U169</i><br>$\phi 80dlacZ$ , for DNA cloning | Bethesda Research Laboratories                         |
| BL21(DE3)                      | <i>F ompT hsdSB(rB-mB<sup>-</sup>) gal dcm (DE3)</i> , for protein expression                              | Invitrogen                                             |
| XL1 Blue                       | Report strain for Bacterial Two-hybrid System                                                              | Stratagene                                             |
| <i>Agrobacterium fabrum</i>    |                                                                                                            |                                                        |
| C58                            | Nopaline type strain; pTiC58, pAtC58                                                                       | Thomashow <i>et al.</i> [55].<br>Knauf and Nester [56] |
| $\Delta y1$                    | Derivative of C58 in which <i>cheY1</i> ( <i>atu0516</i> ) open reading frame (ORF) was deleted            | This study                                             |
| $\Delta y2$                    | Derivative of C58 in which <i>cheY2</i> ( <i>atu0520</i> ) ORF was deleted                                 | This study                                             |
| $\Delta y$                     | Derivative of C58 in which both <i>cheY1</i> and <i>cheY2</i> ORFs were deleted                            | This study                                             |
| $\Delta y1+y1$                 | $\Delta y1$ in which <i>cheY1</i> expression was restored by plasmid pUCA-Y1                               | This study                                             |

|                          |                                                                                                                                            |                          |
|--------------------------|--------------------------------------------------------------------------------------------------------------------------------------------|--------------------------|
| $\Delta y2+y2$           | $\Delta y2$ in which <i>cheY2</i> expression was restored by plasmid pUCA-Y2                                                               | This study               |
| $\Delta y+y1$            | $\Delta y$ in which <i>cheY1</i> expression was restored by plasmid pUCA-Y1                                                                | This study               |
| $\Delta y+y2$            | $\Delta y$ in which <i>cheY2</i> expression was restored by plasmid pUCA-Y2                                                                | This study               |
| $\Delta a$               | Derivative of C58 in which <i>cheA</i> ( <i>atu0517</i> ) ORF was deleted                                                                  | Huang <i>et al.</i> [27] |
| $\Delta aw$              | Derivative of C58 in which <i>cheA</i> , <i>cheW1</i> and <i>cheW2</i> ORFs were deleted                                                   | Huang <i>et al.</i> [27] |
| $\Delta ay$              | Derivative of C58 in which <i>cheA</i> , <i>cheY1</i> and <i>cheY2</i> ORFs were deleted                                                   | This study               |
| $\Delta ays$             | Derivative of C58 in which <i>cheA</i> , <i>cheY1</i> , <i>cheY2</i> and <i>cheS</i> ORFs were deleted                                     | This study               |
| <b>Plasmids</b>          |                                                                                                                                            |                          |
| pEX18Km                  | Derivative of pEX18Tc in which Tc <sup>r</sup> was replaced by <i>npfIII</i> from pCB301; Km <sup>r</sup> , Sur <sup>s</sup>               | Huang <i>et al.</i> [27] |
| pCB301-GFP               | A minim binary vector plasmid carrying the GFP ORF; Km <sup>r</sup>                                                                        | Guo <i>et al.</i> [29]   |
| pUCA-19                  | pUC19 carrying an agrobacterial replicon; Ap <sup>r</sup> , Cr <sup>r</sup>                                                                | Guo <i>et al.</i> [29]   |
| pET30a                   | Expression vector; Km <sup>r</sup>                                                                                                         | Novagen                  |
| pGEX-4T-1                | Expression vector; Ap <sup>r</sup> , Cr <sup>r</sup>                                                                                       | GE Healthcare            |
| pUCA-Y1                  | pUCA-19, carrying 366 bp <i>cheY1</i> ORF at <i>HindIII</i> and <i>EcoRI</i> ; Ap <sup>r</sup> , Cr <sup>r</sup>                           | This study               |
| pUCA-Y1 <sup>A88R</sup>  | pUCA-19, carrying 366 bp CheY1 <sup>A88R</sup> expression cassette at <i>HindIII</i> and <i>EcoRI</i> ; Ap <sup>r</sup> , Cr <sup>r</sup>  | This study               |
| pUCA-Y1 <sup>K91V</sup>  | pUCA-19, carrying 366 bp CheY1 <sup>K91V</sup> expression cassette at <i>HindIII</i> and <i>EcoRI</i> ; Ap <sup>r</sup> , Cr <sup>r</sup>  | This study               |
| pUCA-Y1 <sup>R95A</sup>  | pUCA-19, carrying 366 bp CheY1 <sup>R95A</sup> expression cassette at <i>HindIII</i> and <i>EcoRI</i> ; Ap <sup>r</sup> , Cr <sup>r</sup>  | This study               |
| pUCA-Y1 <sup>W102V</sup> | pUCA-19, carrying 366 bp CheY1 <sup>W102V</sup> expression cassette at <i>HindIII</i> and <i>EcoRI</i> ; Ap <sup>r</sup> , Cr <sup>r</sup> | This study               |
| pUCA-Y1 <sup>V104A</sup> | pUCA-19, carrying 366 bp CheY1 <sup>V104A</sup> expression cassette at <i>HindIII</i> and <i>EcoRI</i> ; Ap <sup>r</sup> , Cr <sup>r</sup> | This study               |
| pUCA-Y1 <sup>R118A</sup> | pUCA-19, carrying 366 bp CheY1 <sup>R118A</sup> expression cassette at <i>HindIII</i> and <i>EcoRI</i> ; Ap <sup>r</sup> , Cr <sup>r</sup> | This study               |
| pUCA-Y2                  | pUCA-19, carrying 390 bp <i>cheY2</i> ORF at <i>HindIII</i> and <i>EcoRI</i> ; Ap <sup>r</sup> , Cr <sup>r</sup>                           | This study               |
| pUCA-Y2 <sup>R93A</sup>  | pUCA-19, carrying 390 bp CheY2 <sup>R93A</sup> expression cassette at <i>HindIII</i> and <i>EcoRI</i> ; Ap <sup>r</sup> , Cr <sup>r</sup>  | This study               |
| pUCA-Y2 <sup>V96K</sup>  | pUCA-19, carrying 390 bp CheY2 <sup>V96K</sup> expression cassette at <i>HindIII</i> and <i>EcoRI</i> ; Ap <sup>r</sup> , Cr <sup>r</sup>  | This study               |
| pUCA-Y2 <sup>A100R</sup> | pUCA-19, carrying 390 bp CheY2 <sup>A100R</sup> expression cassette at <i>HindIII</i> and <i>EcoRI</i> ; Ap <sup>r</sup> , Cr <sup>r</sup> | This study               |

|                          |                                                                                                                                                                                   |            |
|--------------------------|-----------------------------------------------------------------------------------------------------------------------------------------------------------------------------------|------------|
| pUCA-Y2 <sup>V107W</sup> | pUCA-19, carrying 390 bp CheY2 <sup>V107W</sup> expression cassette at <i>HindIII</i> and <i>EcoRI</i> ; Ap <sup>r</sup> , Cr <sup>r</sup>                                        | This study |
| pUCA-Y2 <sup>A109V</sup> | pUCA-19, carrying 390 bp CheY2 <sup>A109V</sup> expression cassette at <i>HindIII</i> and <i>EcoRI</i> ; Ap <sup>r</sup> , Cr <sup>r</sup>                                        | This study |
| pUCA-Y2 <sup>A123R</sup> | pUCA-19, carrying 390 bp CheY2 <sup>A123R</sup> expression cassette at <i>HindIII</i> and <i>EcoRI</i> ; Ap <sup>r</sup> , Cr <sup>r</sup>                                        | This study |
| pEXY1                    | pEX18Km carrying a 979 bp fragment at <i>BamHI</i> and <i>XhoI</i> , which consisted of 474 bp upstream of <i>cheY1</i> and 505 bp downstream of <i>cheY1</i> ; Km <sup>r</sup>   | This study |
| pEXY2                    | pEX18Km carrying a 1,196 bp fragment at <i>BamHI</i> and <i>XhoI</i> , which consisted of 596 bp upstream of <i>cheY2</i> and 600 bp downstream of <i>cheY2</i> ; Km <sup>r</sup> | This study |
| pEXS                     | pEX18Km carrying a 1,053 bp fragment at <i>BamHI</i> and <i>XhoI</i> , which consisted of 563 bp upstream of <i>cheS</i> and 490 bp downstream of <i>cheS</i> ; Km <sup>r</sup>   | This study |
| pGEX-FlIM                | pGEX-4T-1, carrying 960 bp <i>flIM</i> ORF at <i>BamHI</i> and <i>SmaI</i> ; Ap <sup>r</sup> , Cr <sup>r</sup>                                                                    | This study |
| pET30a-CheY1             | pET30a, carrying 363 bp <i>cheY1</i> ORF without stop codon at <i>NdeI</i> and <i>XhoI</i> ; Km <sup>r</sup>                                                                      | This study |
| pET30a-CheY2             | pET30a, carrying 387 bp <i>cheY2</i> ORF without stop codon at <i>NdeI</i> and <i>XhoI</i> ; Km <sup>r</sup>                                                                      | This study |
| pUCA-SGAW1               | pUCA19, carrying <i>cheA-Cegfp</i> and <i>cheW1-Negfp</i> expression cassette at <i>HindIII</i> and <i>EcoRI</i> ; Ap <sup>r</sup> , Cr <sup>r</sup>                              | This study |
| pUCA-SGAY1               | pUCA19, carrying <i>cheA-Cegfp</i> and <i>cheY1-Negfp</i> expression cassette at <i>HindIII</i> and <i>EcoRI</i> ; Ap <sup>r</sup> , Cr <sup>r</sup>                              | This study |
| pUCA-SGAY2               | pUCA19, carrying <i>cheA-Cegfp</i> and <i>cheY2-Negfp</i> expression cassette at <i>HindIII</i> and <i>EcoRI</i> ; Ap <sup>r</sup> , Cr <sup>r</sup>                              | This study |
| pUCA-SGY12               | pUCA19, carrying <i>cheY2-Cegfp</i> and <i>cheY1-Negfp</i> expression cassette at <i>HindIII</i> and <i>EcoRI</i> ; Ap <sup>r</sup> , Cr <sup>r</sup>                             | This study |
| pUCA-SGY1                | pUCA19, carrying <i>Cegfp</i> and <i>cheY1-Negfp</i> expression cassette at <i>HindIII</i> and <i>EcoRI</i> ; Ap <sup>r</sup> , Cr <sup>r</sup>                                   | This study |
| pUCA-SGAY1-Y2            | pUCA19, carrying <i>cheA-Cegfp</i> , <i>cheY1-Negfp</i> , and <i>cheY2</i> ORF expression cassette at <i>HindIII</i> and <i>EcoRI</i> ; Ap <sup>r</sup> , Cr <sup>r</sup>         | This study |
| pUCA-SGAY2-Y1            | pUCA19, carrying <i>cheA-Cegfp</i> , <i>cheY2-Negfp</i> and <i>cheY1</i> ORF expression cassette at <i>HindIII</i> and <i>EcoRI</i> ; Ap <sup>r</sup> , Cr <sup>r</sup>           | This study |

Ap<sup>r</sup>, Cr<sup>r</sup>, Km<sup>r</sup>, and Tc<sup>r</sup> = Resistant to ampicillin, carbenicillin, kanamycin, and tetracycline, respectively; Sur<sup>s</sup> = sucrose sensitivity; ORF = open reading frame.

Table S2. Primers used in this study.

| Primers  | Sequence                                     | Purpose                                                       |
|----------|----------------------------------------------|---------------------------------------------------------------|
| dY1-1    | 5'-GACTCTAGAGGATCCCAGCGCCTCCGAGGCCG-3'       | To amplify the upstream sequence of <i>cheY1</i>              |
| dY1-2    | 5'-TCGTGAAATGTCCCGTATCACTTTTGCATCTCCT-3'     | To amplify the upstream sequence of <i>cheY1</i>              |
| dY1-3    | 5'-TACGGGACATTTACGATGGATATGAACGAAATC-3'      | To amplify the downstream sequence of <i>cheY1</i>            |
| dY1-4    | 5'-TGCTGCCAACTCGAGCGGCTCGAAACCGCTTT-3'       | To amplify the downstream sequence of <i>cheY1</i>            |
| dY2-1    | 5'-GACTCTAGAGGATCCGGCGGGTCGTAAGGTCGTC-3'     | To amplify the upstream sequence of <i>cheY2</i>              |
| dY2-2    | 5'-GCCGCAGCTTCCATCATTTAGTCAGCACCTTCTTTGCG-3' | To amplify the upstream sequence of <i>cheY2</i>              |
| dY2-3    | 5'-GAAGGTGCTGACTAAATGATGGAAGCTGCGGCC-3'      | To amplify the downstream sequence of <i>cheY2</i>            |
| dY2-4    | 5'-TGCTGCCAACTCGAGCGGAGTGGTGGCGGTGTG-3'      | To amplify the downstream sequence of <i>cheY2</i>            |
| dS-1     | 5'-GACTCTAGAGGATCCTTCCAGACCAACCTTCTCG-3'     | To amplify the upstream sequence of <i>cheS</i>               |
| dS-2     | 5'-TTACATGACTCCCTGACGTC-3'                   | To amplify the upstream sequence of <i>cheS</i>               |
| dS-3     | 5'-CAGGGAGTCATGTAAATGGATATGAACGAAATC-3'      | To amplify the downstream sequence of <i>cheS</i>             |
| dS-4     | 5'-TGCTGCCAACTCGAGCGGCTCGAAACCGCTTT-3'       | To amplify the downstream sequence of <i>cheS</i>             |
| pUCAY1-f | 5'-GATTACGCCAAGCTTGGTGAAGAAAAAAGTTCT-3'      | To amplify the sequence of <i>cheY1</i> inserting pUCA19      |
| pUCAY1-r | 5'-ACGGCCAGTGAATTCTCAGGCGGTACGCGCT-3'        | To amplify the sequence of <i>cheY1</i> inserting pUCA19      |
| pUCAY2-f | 5'-GATTACGCCAAGCTTGATGTCTCTCGCAGAAAA-3'      | To amplify the sequence of <i>cheY2</i> inserting pUCA19      |
| pUCAY2-r | 5'-ACGGCCAGTGAATTCTCATTTTCAGCGATCCGA-3'      | To amplify the sequence of <i>cheY2</i> inserting pUCA19      |
| SGA-f    | 5'-GATTACGCCAAGCTTGATGGATATGAACGAAATC-3'     | To amplify the sequence of <i>cheA</i> fusing to <i>Cegfp</i> |

|                        |                                                         |                                                                   |
|------------------------|---------------------------------------------------------|-------------------------------------------------------------------|
| SGA-r                  | 5'-<br>TCCACCCGACGTCCCAAGCTTACCCGTCGCCGCGA<br>GTG-3'    | To amplify the sequence of <i>cheA</i> fusing to<br><i>Cegfp</i>  |
| SGW1-f                 | 5'-TTCGAGGATGCGACTATGTCCAACGCCATCAA-3'                  | To amplify the sequence of <i>cheW1</i> fusing<br>to <i>Negfp</i> |
| SGW1-r                 | 5'-AGAGCCAGAGCCACCGGCCGCTTCGCGCGCCA-<br>3'              | To amplify the sequence of <i>cheW1</i> fusing<br>to <i>Negfp</i> |
| gfp-1                  | 5'-<br>GGTGGCTCTGGCTCTGGCTCGAGGGTGAGCAAGG<br>GCCAGGA-3' | To amplify the N-terminal sequence of<br><i>egfp</i>              |
| gfp-2                  | 5'-<br>ACGGCCAGTGAATTCTTACTGCTTGTCGGCCATGA-<br>3'       | To amplify the N-terminal sequence of<br><i>egfp</i>              |
| gfp-3                  | 5'-<br>GGGACGTCGGGTGGAAGCGGTAAGAACGGCATCA<br>AGGTG-3'   | To amplify the C-terminal sequence of<br><i>egfp</i>              |
| gfp-4                  | 5'-<br>AGTCGCATCCTCGAATTCTTACTTGTACAGCTCGTC<br>-3'      | To amplify the C-terminal sequence of<br><i>egfp</i>              |
| SGY2-1                 | 5'-TTCGAGGATGCGACTATGTCTCTCGCAGAAAA-3'                  | To amplify the sequence of <i>cheY2</i> fusing<br>to <i>Negfp</i> |
| SGY2-2                 | 5'-<br>AGAGCCAGAGCCACCTTTCAGCGATCCGAAAAC-3'             | To amplify the sequence of <i>cheY2</i> fusing<br>to <i>Negfp</i> |
| SGY2-3                 | 5'-GATTACGCCAAGCTTGATGTCTCTCGCAGAAAA-<br>3'             | To amplify the sequence of <i>cheY2</i> fusing<br>to <i>Cegfp</i> |
| SGY2-4                 | 5'-<br>TCCACCCGACGTCCCAAGCTTTTTTCAGCGATCCGA<br>AAAC-3'  | To amplify the sequence of <i>cheY2</i> fusing<br>to <i>Cegfp</i> |
| SGY1-f                 | 5'-TTCGAGGATGCGACTGTGAAGAAAAAAGTTCT-<br>3'              | To amplify the sequence of <i>cheY1</i> fusing<br>to <i>Negfp</i> |
| SGY1-r                 | 5'-AGAGCCAGAGCCACCGGCGGTTACGCGCTCAA-<br>3'              | To amplify the sequence of <i>cheY1</i> fusing<br>to <i>Negfp</i> |
| Y1 <sup>A88R</sup> -f  | 5'-GATCGGGAAAAGAAGAACCGCGC-3'                           | To amplify the sequence of pUCA-Y1 <sup>A88R</sup>                |
| Y1 <sup>A88R</sup> -r  | 5'-GCTTTCGGTCGTCAGAAC-3'                                | To amplify the sequence of pUCA-Y1 <sup>A88R</sup>                |
| Y1 <sup>K91V</sup> -f  | 5'-AAGGTGAACCGCGCCCGCCAGG-3'                            | To amplify the sequence of pUCA-Y1 <sup>K91V</sup>                |
| Y1 <sup>K91V</sup> -r  | 5'-TTCCGCATCGCTTTCGGT-3'                                | To amplify the sequence of pUCA-Y1 <sup>K91V</sup>                |
| Y1 <sup>R95A</sup> -f  | 5'-GCCCAGGCCGGTGCGACCG-3'                               | To amplify the sequence of pUCA-Y1 <sup>R95A</sup>                |
| Y1 <sup>R95A</sup> -r  | 5'-GGCGCGGTTCTTCTTTTCC-3'                               | To amplify the sequence of pUCA-Y1 <sup>R95A</sup>                |
| Y1 <sup>W102V</sup> -f | 5'-GGCGTGATCGTCAAGCCGTTCTGA-3'                          | To amplify the sequence of pUCA-Y1 <sup>W102V</sup>               |

|                        |                                |                                                     |
|------------------------|--------------------------------|-----------------------------------------------------|
| Y1 <sup>W102V</sup> -r | 5'-GGTCGCACCGGCTGGC-3'         | To amplify the sequence of pUCA-Y1 <sup>W102V</sup> |
| Y1 <sup>V104A</sup> -f | 5'-ATCGCCAAGCCGTTTCGACCCTGC-3' | To amplify the sequence of pUCA-Y1 <sup>V104A</sup> |
| Y1 <sup>V104A</sup> -r | 5'-CCAGCCGGTCGCACCGG-3'        | To amplify the sequence of pUCA-Y1 <sup>V104A</sup> |
| Y1 <sup>R118A</sup> -f | 5'-GAGGCCGTAAACCGCCTGAGAAT-3'  | To amplify the sequence of pUCA-Y1 <sup>R118A</sup> |
| Y1 <sup>R118A</sup> -r | 5'-AATGGCATCGATGAGTTT-3'       | To amplify the sequence of pUCA-Y1 <sup>R118A</sup> |
| Y2 <sup>R93A</sup> -f  | 5'-GCCGCGCTGGTGCAGAAGGC-3'     | To amplify the sequence of pUCA-Y2 <sup>R93A</sup>  |
| Y2 <sup>R93A</sup> -r  | 5'-GTCACCCTGCGCGGTGAG-3'       | To amplify the sequence of pUCA-Y2 <sup>R93A</sup>  |
| Y2 <sup>V96K</sup> -f  | 5'-CTGAAGCAGAAGGCAGCCCAGCT-3'  | To amplify the sequence of pUCA-Y2 <sup>V96K</sup>  |
| Y2 <sup>V96K</sup> -r  | 5'-CGCGCGGTCACCCTGCG-3'        | To amplify the sequence of pUCA-Y2 <sup>V96K</sup>  |
| Y2 <sup>A100R</sup> -f | 5'-CGCCAGCTCGGCGCCAACAA-3'     | To amplify the sequence of pUCA-Y2 <sup>A100R</sup> |
| Y2 <sup>A100R</sup> -r | 5'-TGCCTTCTGCACCAGCGC-3'       | To amplify the sequence of pUCA-Y2 <sup>A100R</sup> |
| Y2 <sup>V107W</sup> -f | 5'-AACTGGCTGGCCAAGCCCTTCA-3'   | To amplify the sequence of pUCA-Y2 <sup>V107W</sup> |
| Y2 <sup>V107W</sup> -r | 5'-GTTGGCGCCGAGCTGGG-3'        | To amplify the sequence of pUCA-Y2 <sup>V107W</sup> |
| Y2 <sup>A109V</sup> -f | 5'-CTGGTCAAGCCCTTCAACATCGA-3'  | To amplify the sequence of pUCA-Y2 <sup>A109V</sup> |
| Y2 <sup>A109V</sup> -r | 5'-CACGTTGTTGGCGCCGAG-3'       | To amplify the sequence of pUCA-Y2 <sup>A109V</sup> |
| Y2 <sup>A123R</sup> -f | 5'-GAACGGGTTTTTCGGATCGCTGAA-3' | To amplify the sequence of pUCA-Y2 <sup>A123R</sup> |
| Y2 <sup>A123R</sup> -r | 5'-GATGGCCGCGCGCATCTT-3'       | To amplify the sequence of pUCA-Y2 <sup>A123R</sup> |

## Reference

54. Sanders, D.A.; Gillece-Castro, B.L.; Stock, A.M.; Burlingame, A.L.; Koshland, D.E. Identification of the site of phosphorylation of the chemotaxis response regulator protein, CheY. *J. Biol. Chem.* **1989**, *264*, 21770-21778.
55. Thomashow, M.F.; Nutter, R.; Montoya, A.L.; Gordon, M.P.; Nester, E.W. Integration and organization of Ti plasmid sequences in crown gall tumors. *Cell* **1980**, *19*, 729-739.
56. Knauf, V.C.; Nester, E.W. Wide host range cloning vectors: A cosmid clone bank of an *Agrobacterium* Ti plasmid. *Plasmid* **1982**, *8*, 45-54.
